# Supplementary material
Source: publisher figshare collection journal article supplement (https://tandf.figshare.com/articles/dataset/_/13213424)
Supplement: Supplementary file 5 [file 1]

Supplemental Figure 3.

A.

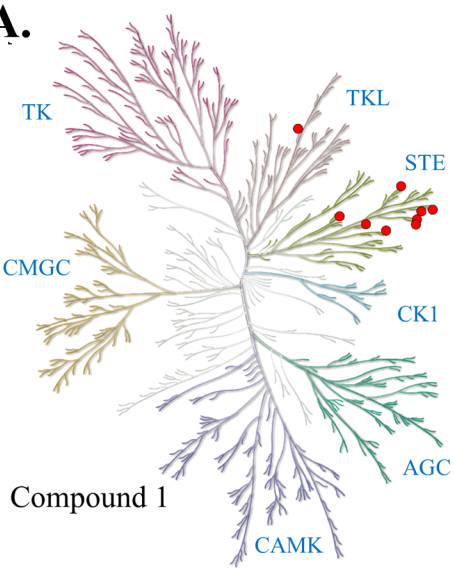

"Illustration reproduced courtesy of Cell Signaling Technology, Inc. (www.cellsignal.com)"

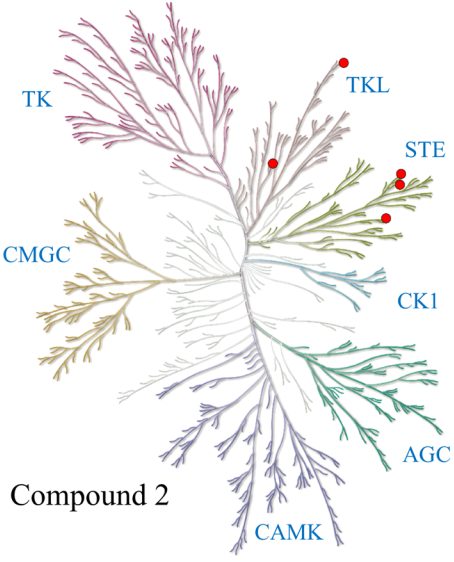

"Illustration reproduced courtesy of Cell Signaling Technology, Inc. (www.cellsignal.com)"

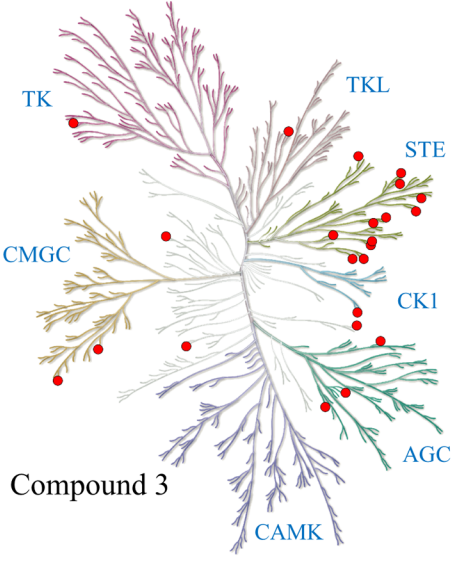

"Illustration reproduced courtesy of Cell Signaling Technology, Inc. (www.cellsignal.com)"

B.

| Group | Family     | Subfamily | Kinase        | Compound |     |     |
|-------|------------|-----------|---------------|----------|-----|-----|
|       |            |           |               | 1        | 2   | 3   |
| AGC   | Akt        | -         | AKT1          | 1%       | 21% | 13% |
| AGC   | DMPK       | ROCK      | ROCK2         | 6%       | 15% | 0%  |
| AGC   | GRK        | GRK       | RHOK          | 14%      | 6%  | 56% |
| AGC   | MAST       | MASTL     | MASTL         | 24%      | 5%  | 57% |
| AGC   | NDR        | -         | LATS2         | 15%      | 15% | 63% |
| AGC   | PDK1       | -         | PDK1          | 1%       | 3%  | 13% |
| AGC   | PKA        | -         | PKACa         | 5%       | 13% | 6%  |
| AGC   | PKC        | Eta       | PKCe          | 10%      | 34% | 0%  |
| CAMK  | CAMK1      | -         | CaMK1d        | 5%       | 1%  | 8%  |
| CAMK  | CAMKL      | CHK1      | CHK1          | 10%      | 0%  | 14% |
| CAMK  | CAMKL      | MELK      | MELK          | 39%      | 44% | 28% |
| CAMK  | DCAMKL     | -         | DCAMKL1       | 0%       | 15% | 0%  |
| CAMK  | MAPKAPK    | MAPKAPK   | MAPKAPK2      | 3%       | 7%  | 24% |
| CAMK  | PIM        | -         | PIM1          | 14%      | 3%  | 22% |
| CAMK  | TSSK       | -         | TSSK1         | 10%      | 12% | 7%  |
| CK1   | VRK        | -         | VRK2          | 46%      | 45% | 79% |
| CMGC  | CDK        | CDC2      | CDK2          | 35%      | 0%  | 57% |
| CMGC  | CDK        | CDK4      | CDK4          | 11%      | 8%  | 0%  |
| CMGC  | CDK        | CDK8      | CDK11         | 16%      | 29% | 40% |
| CMGC  | CDK        | CDK9      | CDK9          | 23%      | 2%  | 76% |
| CMGC  | CDKL       | -         | CDKL5         | 3%       | 3%  | 0%  |
| CMGC  | MAPK       | ERK1      | ERK1          | 45%      | 7%  | 0%  |
| CMGC  | SRPK       | -         | MSSK1         | 14%      | 0%  | 2%  |
| Other | Aur        | -         | AurA          | 13%      | 22% | 33% |
| Other | IKK        | -         | IKKb          | 13%      | 18% | 46% |
| Other | IRE        | -         | IRE1          | 44%      | 10% | 57% |
| Other | NEK        | NEK2      | NEK2          | 4%       | 20% | 0%  |
| Other | PLK        | PLK2      | PLK3          | 15%      | 20% | 72% |
| Other | ULK        | ULK       | ULK2          | 12%      | 5%  | 69% |
| STE   | STE7       | MEK1      | MAP2K1        | 9%       | 8%  | 67% |
| STE   | STE7       | MEK1      | MAP2K2        | 20%      | 8%  | 61% |
| STE   | STE7       | MEK3      | MAP2K6        | 24%      | 10% | 70% |
| STE   | STE7       | MEK4      | MAP2K4        | 49%      | 18% | 77% |
| STE   | STE7       | MEK5      | MAP2K5        | 10%      | 0%  | 53% |
| STE   | STE11      | ASK       | MAP3K5        | 19%      | 0%  | 43% |
| STE   | STE11      | MEKK15    | MAP3K19       | 31%      | 45% | 16% |
| STE   | STE11      | MEKK2     | MAP3K2        | 32%      | 0%  | 63% |
| STE   | STE20      | FRAY      | STLK3         | 51%      | 8%  | 34% |
| STE   | STE20      | KHS       | HPK1 (MAP4K1) | 36%      | 22% | 46% |
| STE   | STE20      | KHS       | GCK (MAP4K2)  | 19%      | 53% | 76% |
| STE   | STE20      | KHS       | KHS2 (MAP4K3) | 29%      | 7%  | 44% |
| STE   | STE20      | MSN       | MINK          | 77%      | 15% | 0%  |
| STE   | STE20      | MSN       | TNIK          | 86%      | 16% | 57% |
| STE   | STE20      | MST       | MST1          | 5%       | 3%  | 0%  |
| STE   | STE20      | MST       | MST2          | 0%       | 2%  | 0%  |
| STE   | STE20      | NinaC     | MYO3A         | 51%      | 12% | 37% |
| STE   | STE20      | NinaC     | MYO3B         | 57%      | 42% | 52% |
| STE   | STE20      | PAKA      | PAK1          | 0%       | 0%  | 0%  |
| STE   | STE20      | PAKA      | PAK2          | 4%       | 2%  | 0%  |
| STE   | STE20      | PAKB      | PAK4          | 2%       | 6%  | 28% |
| STE   | STE20      | PAKB      | PAK6          | 5%       | 0%  | 0%  |
| STE   | STE20      | SLK       | SLK           | 74%      | 28% | 43% |
| STE   | STE20      | TAO       | TAO2 (TAOK2)  | 17%      | 19% | 0%  |
| STE   | STE20      | TAO       | TAO3 (TAOK3)  | 20%      | 28% | 55% |
| STE   | STE20      | YSK       | MST3          | 23%      | 33% | 0%  |
| STE   | STE20      | YSK       | YSK1          | 6%       | 12% | 0%  |
| STE   | STE-Unique | -         | COT           | 22%      | 4%  | 23% |
| STE   | STE-Unique | -         | NIK           | 7%       | 0%  | 43% |
| TK    | EGFR       | -         | ErbB2         | 14%      | 44% | 0%  |
| TK    | Eph        | -         | EphA2         | 46%      | 0%  | 0%  |
| TK    | FAK        | -         | FAK           | 7%       | 3%  | 0%  |
| TK    | InsR       | -         | IGF1R         | 10%      | 0%  | 4%  |
| TK    | Syk        | -         | ZAP70         | 6%       | 1%  | 4%  |
| TK    | Tec        | -         | BTK           | 13%      | 17% | 70% |
| TK    | Tie        | -         | TIE2          | 34%      | 19% | 23% |
| TKL   | IRAK       | -         | IRAK1         | 12%      | 12% | 12% |
| TKL   | LISK       | TESK      | TESK1         | 26%      | 31% | 55% |
| TKL   | LRRK       | -         | LRRK2         | 33%      | 58% | 0%  |
| TKL   | MLK        | MLK       | MLK1          | 19%      | 51% | 5%  |
| TKL   | MLK        | ZAK       | ZAK           | 54%      | 2%  | 32% |
