# Supplementary material
Source: publisher figshare collection journal article supplement (https://tandf.figshare.com/articles/dataset/_/13213424)

# Supplemental Figure 7.

A.

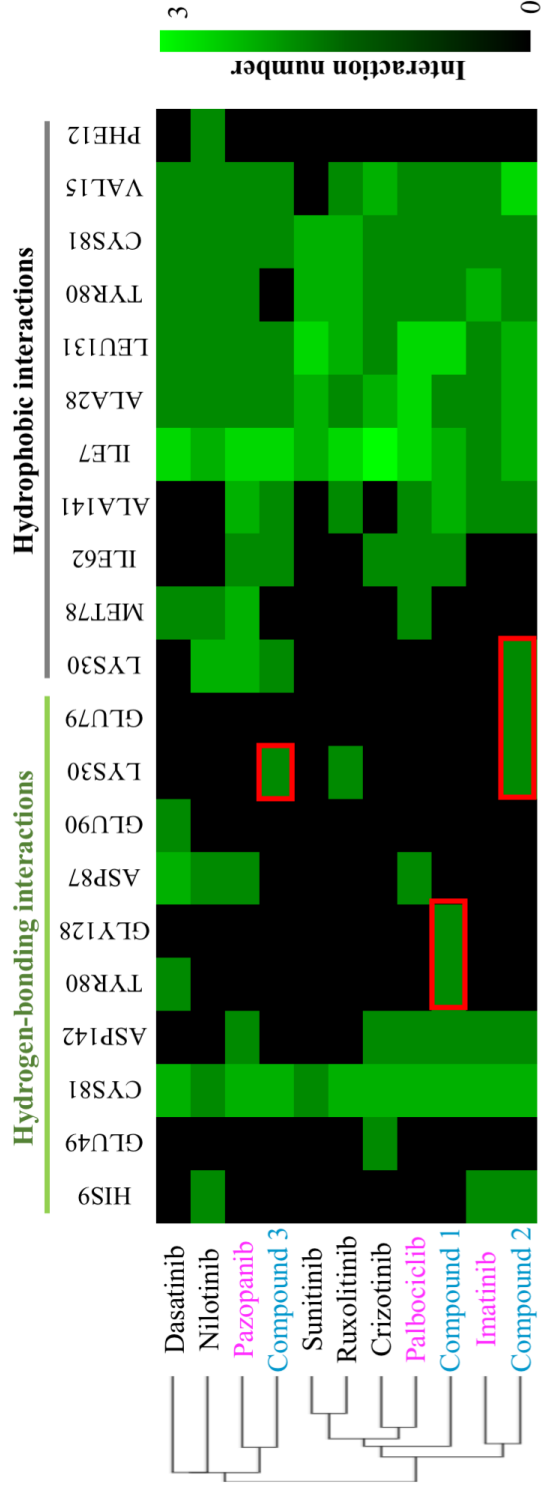

B.

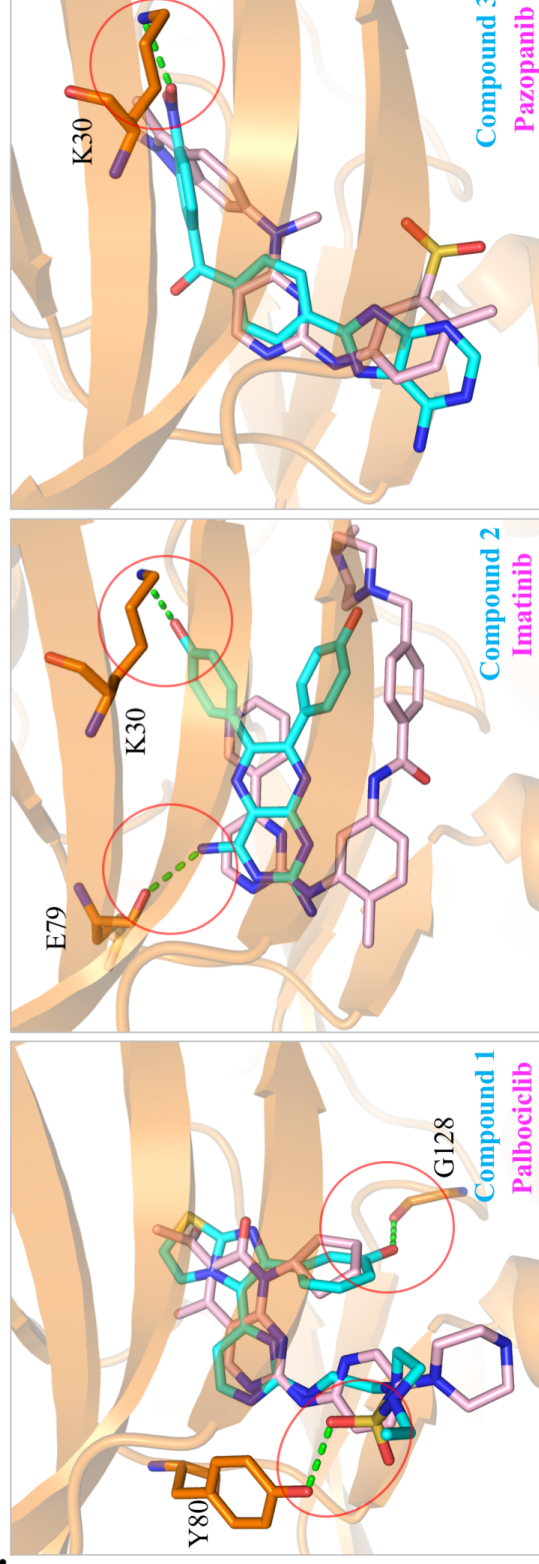

Supplement: Supplementary file 1 [file 1]

# Supplemental Figure 1.

**A.**

## Compound 1

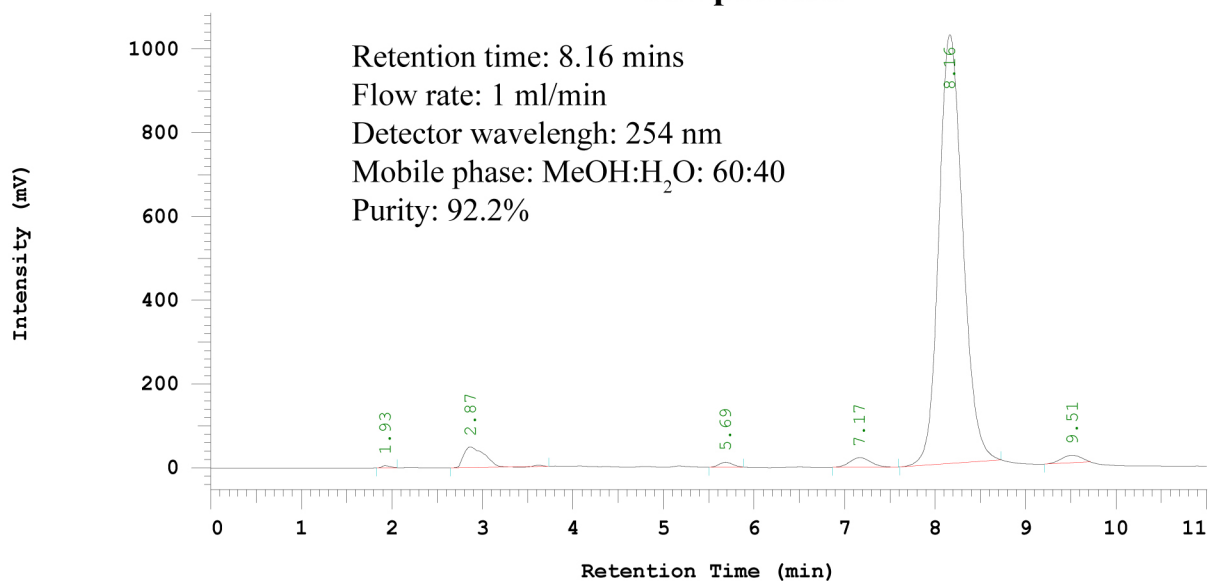

**B.**

## Compound 2

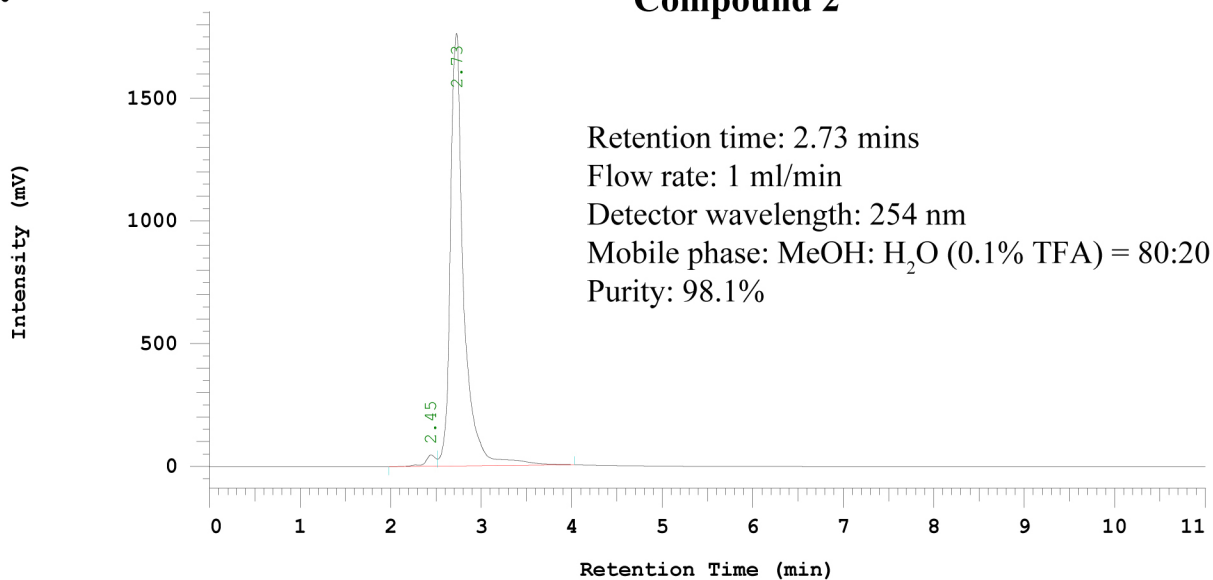

**C.**

## Compound 3

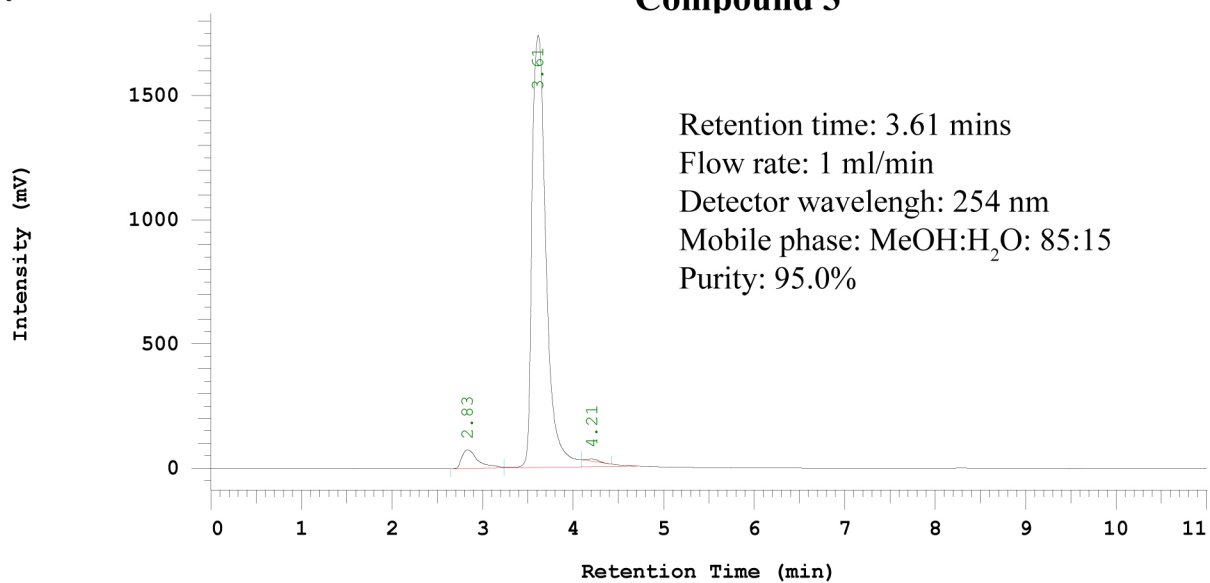

Supplement: Supplementary file 4 [file 1]

# Supplemental Figure 2.

**A.**

## MAP4K5

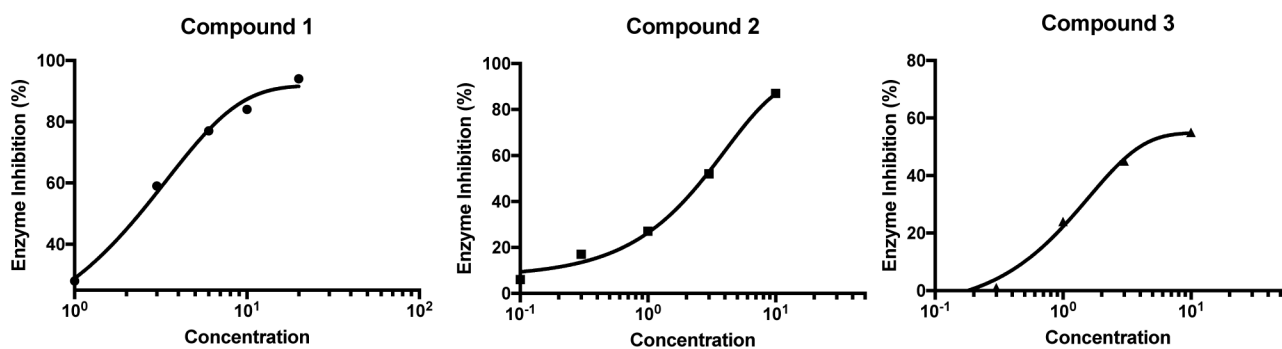

**B.**

## TAOK1

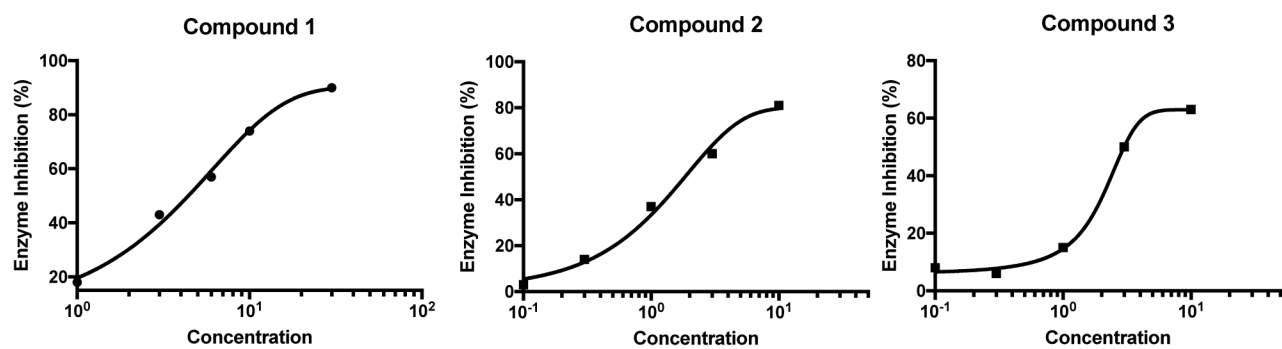

Supplement: Supplementary file 6 [file 1]

Supplemental Figure 6.

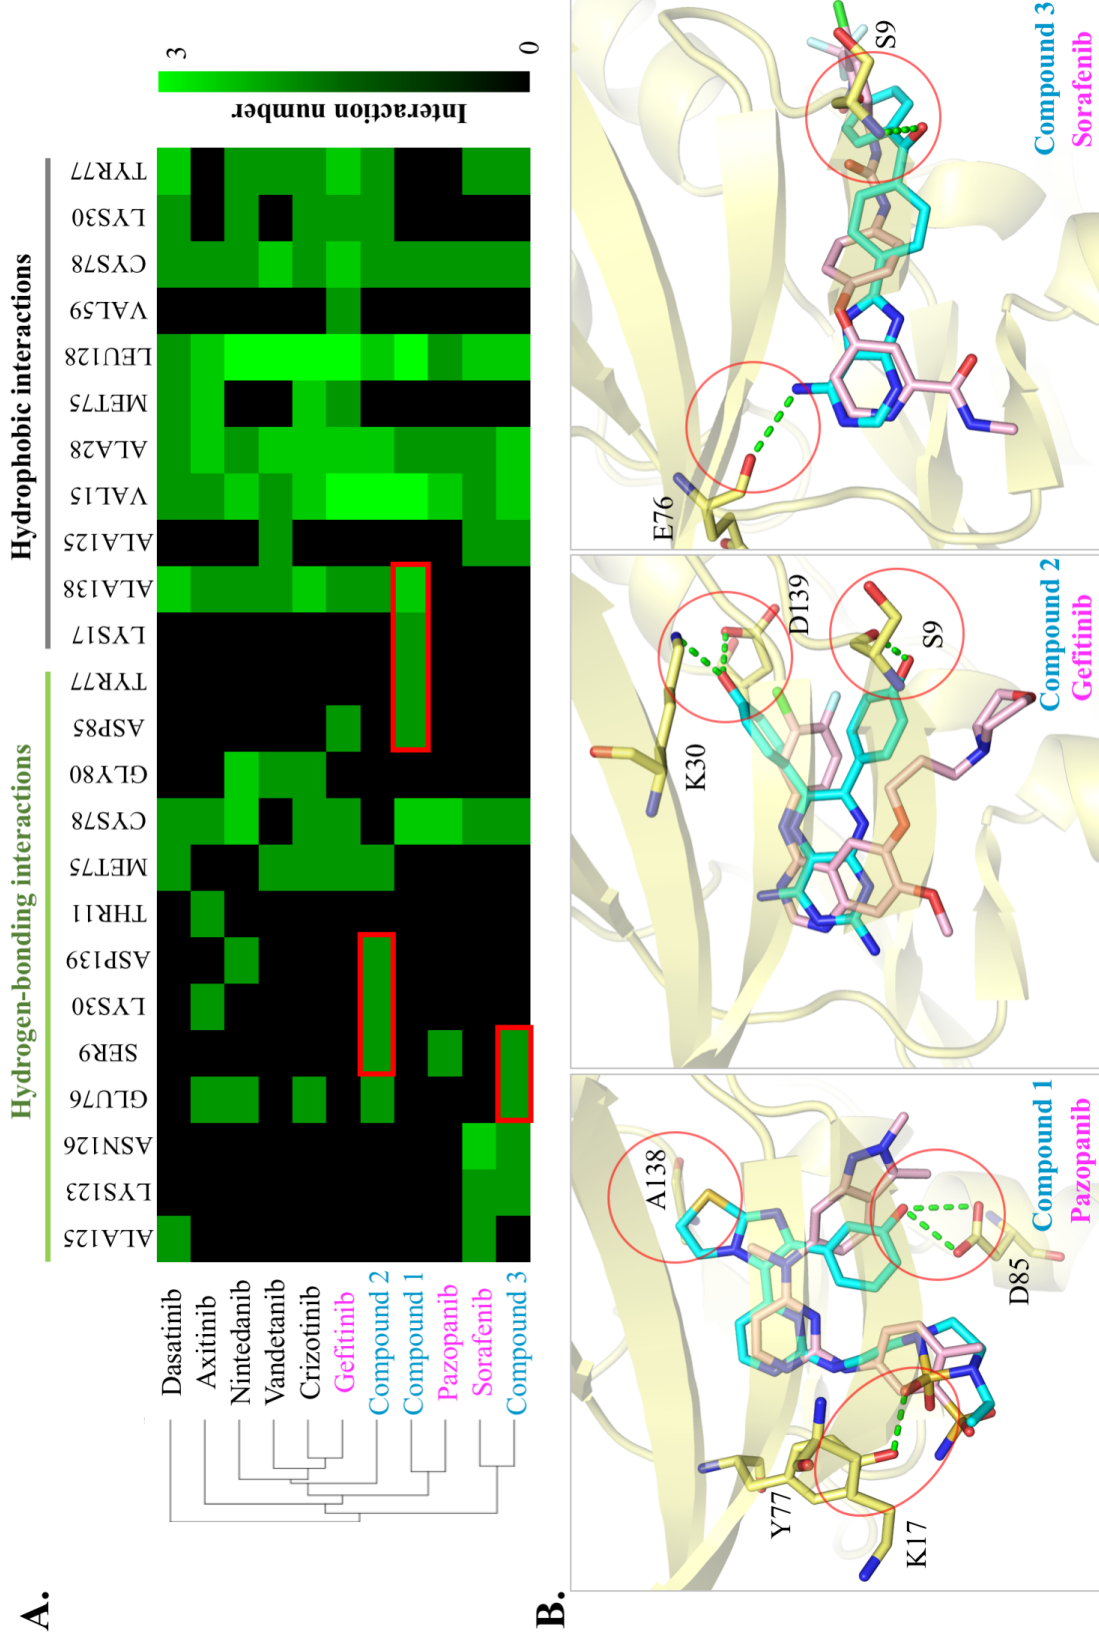

Supplement: Supplementary file 7 [file 1]
